# Supplementary material
Source: publisher figshare collection journal article supplement (https://sage.figshare.com/ndownloader/files/14375438)
Supplement: Supplementary file 1 [file 14375438]

**1.**

**This is a study being conducted by Dr. Chris Ifediora (Senior Lecturer) and Prof. Gary Rogers (the Deputy Head of Medical School), both researchers from the Griffith University School of Medicine, Gold Coast, Australia.**

**The study aims to assess the clinical teaching services available to doctors involved in the after-hours home visit services in Australia. All the doctors involved in the service-delivery (whose companies are part of the NAMDS), irrespective of the Medical Deputising Service (MDS) company they are affiliated to, are being contacted.**

**Your participation in this study is voluntary, and strict confidentiality for both the individual doctors and the MDS companies they work for, will be maintained throughout. Also note that your response is confidential, and will not be revealed to your parent MDS company.**

**The survey is expected to take between 10 and 15 minutes to complete, and, apart from this time consideration, no risks or discomforts are anticipated from taking part.**

**It is hoped that the findings will help identify the strengths and weaknesses of the existing clinical teaching services available to doctors in the after hours medical services, and help make suggestions on improving the overall quality of health care delivery in the industry.**

**A copy of the finished work is expected to be published in national or international peer-reviewed journals. However, should any individual participant be interested, we will make a copy available to such a person either directly, or through their parent MDS company.**

**Ethical clearance has been granted by the Griffith University Human Research Ethics Committee, with a reference number of "GU Ref No: 2017/648".**

**The collated, anonymized data and computed results will be stored in the Griffith University Research Storage Service during the active phase of this research. After the study, all the data will be moved to the Griffith Archive Storage System, and will be kept there for a duration of up to five years, after which it will be destroyed in line with the Griffith University's ethical regulations.**

**If you have any concerns with this study, please contact: Dr. Chris O. Ifediora (MBBS, MPH, FRACGP) through "c.ifediora@griffith.edu.au" or "0755808331". If, however, you have additional questions about the ethics of this research, please contact the Manager, Research Ethics on 07 3735 4375 or "research-ethics@griffith.edu.au."**

**Proceeding to the next page allows you to complete the questions, and will be considered as granting consent to participate. You may also indicate consent by answering the question below.**

**Please kindly note that once the completed questionnaire is submitted, it cannot be withdrawn given that you cannot be identified as the entire process is anonymous.**

**Do you consent to participating in this study?**

☐ **Yes**

☐ **No**

**\* 2. Please how does the following apply to you regarding your involvement in after-hours home visit services and Medical Deputising Services (MDS) over the last 12 months (choose only one response for each question).**

|                                                                                                                                    | <b>Strongly Agree</b>    | <b>Agree</b>             | <b>Unsure</b>            | <b>Disagree</b>          | <b>Strongly Disagree</b> |
|------------------------------------------------------------------------------------------------------------------------------------|--------------------------|--------------------------|--------------------------|--------------------------|--------------------------|
| <b>I have access to a structured clinical teaching program</b>                                                                     | <input type="checkbox"/> |
| <b>I have access to an environment for effective clinical teaching (online and/or face-to-face)</b>                                | <input type="checkbox"/> |
| <b>Time is set aside exclusively for clinical teachings/meetings</b>                                                               | <input type="checkbox"/> |
| <b>The clinical teachings/meetings have useful cases and reviews applicable to our job</b>                                         | <input type="checkbox"/> |
| <b>When needed, I can get timely and easy access to professional development leave (for study, CMEs, seminars, exams, etc.)</b>    | <input type="checkbox"/> |
| <b>I have access to a range of educational and informative resources appropriate to my educational and clinical practice needs</b> | <input type="checkbox"/> |
| <b>I have access to a proper system of consultations and feedbacks regarding my work</b>                                           | <input type="checkbox"/> |
| <b>A system for sound and effective supervision and assessment of my work is in existence</b>                                      | <input type="checkbox"/> |
| <b>I am satisfied with the length of time allocated for each clinical teaching activity</b>                                        | <input type="checkbox"/> |
| <b>I am satisfied with the content(s) of the clinical teaching activities</b>                                                      | <input type="checkbox"/> |
| <b>I am satisfied with the regularity of the existing teaching activities</b>                                                      | <input type="checkbox"/> |
| <b>The existing clinical teaching programs are facilitated by the MDS company I work for</b>                                       | <input type="checkbox"/> |

**\* 3. What is your gender?**

- ☐ Female  
☐ Male  
☐ Transgender or other

**\* 4. What is your age range (years)?**

- ☐ <25  
☐ 25 to 39  
☐ 40 to 59  
☐ 60 or older

**\* 5. The following applies to me regarding my AHPRA registration:**

- ☐ I have a GP Fellowship or VR status  
☐ I have a limited, non-fellowship or non-specialist status

**\* 6. Which of the following applies to you regarding your work with the MDS over the past 12 months?**

- ☐ Mentoring and/or Supervision services are compulsory for me to maintain my medical registration  
☐ Mentoring and/or Supervision services are not compulsory for me to maintain my medical registration

**\* 7. In the last 12 months, regarding clinical teaching facilitated by the Medical Deputising Company you work for, please choose one of the following:**

- ☐ I have not been involved in any clinical teaching or session at all
- ☐ I have only been involved in live online clinical teachings/sessions
- ☐ I have only been involved in face-to-face clinical teachings/sessions
- ☐ I have been involved in a mix of both online and face-to-face clinical teachings/sessions
- ☐ I have been involved in clinical teaching sessions, but not through any of the above means. Please state

**\* 8. What is your level of participation in clinical teachings with the MDS over the last 12 months?**

- ☐ I participate only as a facilitator or tutor in the meetings
- ☐ I participate only as a listener or case presenter
- ☐ I participate as both a facilitator (tutor) and a listener (case presenter) at different times

**\* 9. To the best of your knowledge, how often in the last 12 months does clinical teachings for doctors occur in your MDS company? (please choose only one answer):**

- ☐ Not at all
- ☐ Weekly
- ☐ Fothnightly
- ☐ Monthly
- ☐ Six Monthly
- ☐ Once in the last 12 months

**\* 10. Which of the following best describes your primary affiliation in medical practice? (please choose only one answer):**

- ☐ General Practice
- ☐ Emergency Department
- ☐ Medical Specialty (includes Occupational Health, Public Health, etc.)
- ☐ Surgical Specialty (Includes Obstetrics/Gynaecology, ENT, etc.)
- ☐ Paediatrics
- ☐ Other

**\* 11. Which state or territory have you done most of your after-hours home visit job in the last 12 months? Please choose only one:**

- ☐ Australian Capital Territory
- ☐ New South Wales
- ☐ Northern Territory
- ☐ Queensland
- ☐ South Australia
- ☐ Tasmania
- ☐ Victoria
- ☐ Western Australia

**\* 12. Apart from undertaking after-hours home visit services, what else do you do?**

- ☐ I also work as a doctor in a regular-hour daytime general practice job
- ☐ I also work as a doctor in a hospital-based position
- ☐ I work nowhere else (I only do the after-hours home visit job)
- ☐ I also work elsewhere, but not as a doctor (administrative, teaching, etc.). Please state the position i

**13. Do you have any comment and/or suggestions regarding clinical teaching in after-hours medical home visits?**

**Thank you very much for your time in responding to this survey.**
